# Supplementary material
Source: Springer Nature journal article supplement (https://www.springermedizin.de/resource/supplementary/12931_2010_1038_MOESM4_ESM.pdf/9425426)

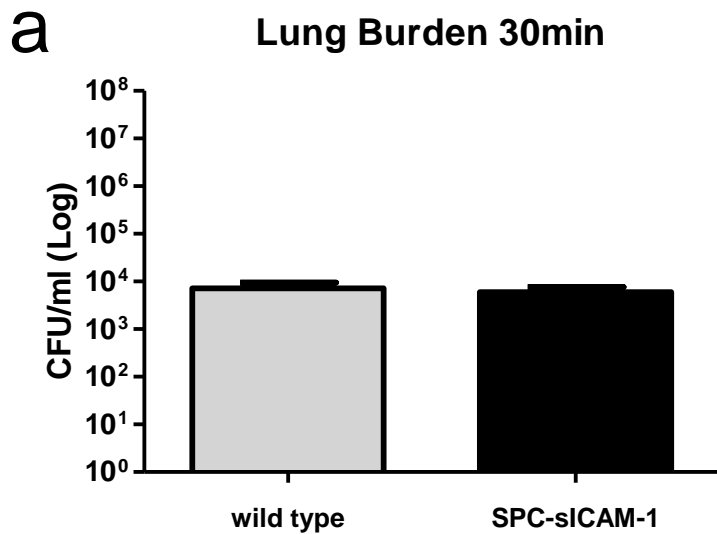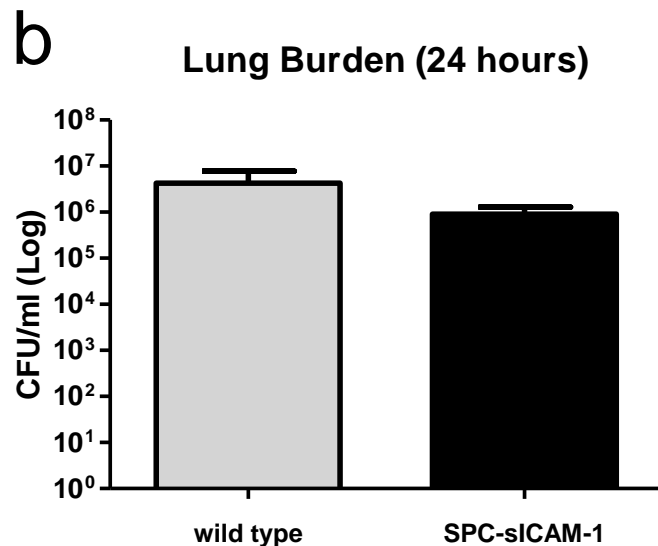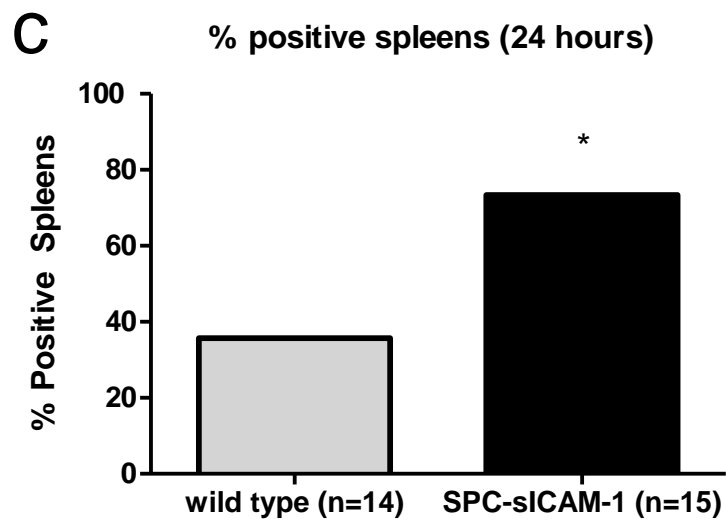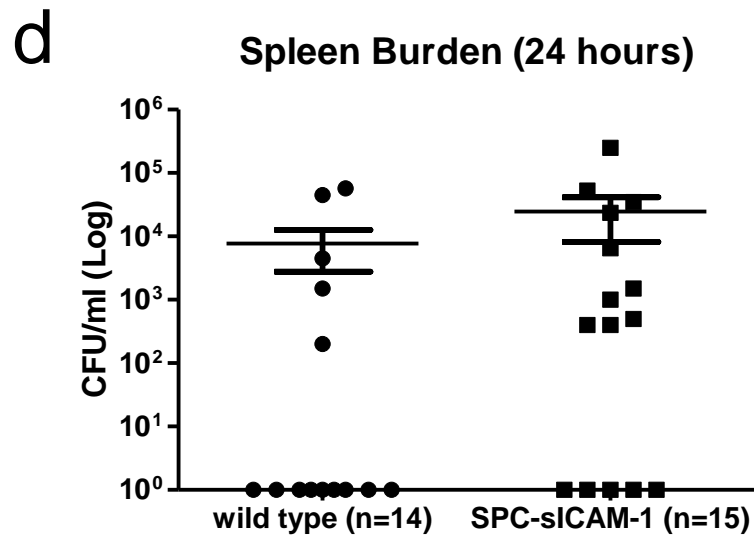

Supplement: MOESM4 [file 9425426]
